# Supplementary material for: Placental growth factor promotes tumour desmoplasia and treatment resistance in intrahepatic cholangiocarcinoma
Source: HighWire-hosted journal article supplement (doi:10.1136/gutjnl-2020-322493), 2021-01-11
Supplement: gutjnl-2020-322493supp003_data_supplement.pdf [file gutjnl-2020-322493supp003_data_supplement.pdf]

**Supplemental Table S2: PIGF and Nrp1 expression scoring using immunohistochemistry in ICC tissue by disease stage**

|            | Grade           | Number (%) | T (UICC) |    |     |    | P value |
|------------|-----------------|------------|----------|----|-----|----|---------|
|            |                 |            | I        | II | III | IV |         |
| PIGF score | Negative        | 6 (14.0)   | 3        | 0  | 3   | 0  | 0.031   |
|            | Low             | 6 (14.0)   | 3        | 1  | 1   | 1  |         |
|            | Moderately high | 20 (46.5)  | 3        | 1  | 13  | 3  |         |
|            | High            | 11 (25.5)  | 1        | 5  | 3   | 2  |         |
| Nrp1 score | Negative        | 0 (0)      | 0        | 0  | 0   | 0  | 0.66    |
|            | Low             | 0 (0)      | 0        | 0  | 0   | 0  |         |
|            | Moderately high | 9 (20.9)   | 3        | 1  | 3   | 2  |         |
|            | High            | 34 (79.1)  | 7        | 6  | 17  | 4  |         |
