# Supplementary material for: Placental growth factor promotes tumour desmoplasia and treatment resistance in intrahepatic cholangiocarcinoma
Source: HighWire-hosted journal article supplement (doi:10.1136/gutjnl-2020-322493), 2021-01-11
Supplement: gutjnl-2020-322493supp005_data_supplement.pdf [file gutjnl-2020-322493supp005_data_supplement.pdf]

**Supplemental Table S3: Patient characteristics from PDX cohort**

| PDX number | Age (Dx) | Gender | Intra-/Extra-Hepatic | Tumor size | TNM stage |      |    | Lung mets | Overall stage | Grade | Histology      | Differentiation           |
|------------|----------|--------|----------------------|------------|-----------|------|----|-----------|---------------|-------|----------------|---------------------------|
| 42         | 36       | male   | ICC                  | 3.4        | TX        | NX   | M1 | no        | IV            | G3    | Adenocarcinoma | poorly differentiated     |
| 55         | 60       | male   | ICC                  | 3.3        | pT1       | NX   | M0 | no        | I             | G2    | Adenocarcinoma | moderately differentiated |
| 80         | 48       | male   | ICC                  | N/A        | TX        | NX   | M1 | no        | IV            | N/A   | Adenocarcinoma | N/A                       |
| 81         | 30       | female | ICC                  | N/A        | TX        | NX   | M0 | no        | IV            | N/A   | Adenocarcinoma | N/A                       |
| 103        | 61       | female | ICC                  | 6          | pT3       | pN1  | M0 | no        | IIIB          | G1    | Adenocarcinoma | well differentiated       |
| 115        | 58       | male   | ICC                  | N/A        | M1        | NX   | M1 | yes       | IV            | N/A   | Adenocarcinoma | N/A                       |
| 116        | 69       | male   | ICC                  | 5.6        | pT3       | pN1  | M0 | no        | IIIB          | G2    | Adenocarcinoma | moderately differentiated |
| 135        | 34       | male   | ICC                  | N/A        | TX        | NX   | M0 | no        | IV            | N/A   | Adenocarcinoma | N/A                       |
| 142        | 79       | male   | ICC                  | 3.2        | pT1       | pN0  | M0 | no        | I             | N/A   | Adenocarcinoma | moderately differentiated |
| 148        | 56       | female | ICC                  | 10         | pT1       | pN1  | M0 | no        | IIIB          | G3    | Adenocarcinoma | poorly differentiated     |
| 165        | 65       | male   | ICC                  | 8.3        | pT1       | pN0  | M0 | no        | I             | G2    | Adenocarcinoma | moderately differentiated |
| 169        | 77       | female | ICC                  | 7          | pT2b      | pN0  | M0 | no        | I / II        | G3    | Adenocarcinoma | poorly differentiated     |
| 179        | 66       | male   | ICC                  | N/A        | cT4       | NX   | M0 | no        | IIIB          | N/A   | Adenocarcinoma | N/A                       |
| 186        | 68       | male   | ICC                  | 4.8        | ypT1      | ypN0 | M0 | no        | I             | G2    | Adenocarcinoma | moderately differentiated |
| 193        | 49       | male   | ICC                  | 2          | pT2b      | pN0  | M0 | no        | II            | G2    | Adenocarcinoma | moderately differentiated |
| 194        | 49       | male   | ICC                  | 7.3        | pT3       | pN1  | M0 | no        | IIIB          | G2    | Adenocarcinoma | moderately differentiated |
| 231        | 70       | female | ICC                  | 3.8        | pT1       | pN0  | M0 | no        | I             | G3    | Adenocarcinoma | poorly differentiated     |
| 261        | 65       | male   | ICC                  | 3.1        | ypT1      | ypN0 | M0 | no        | I             | G2    | Adenocarcinoma | moderately differentiated |
| 276        | 57       | female | ICC                  | 5          | ypT2b     | ypN1 | M1 | no        | IV            | G3    | Adenocarcinoma | poorly differentiated     |
| 305        | 72       | female | ICC                  | 5.2        | ypT3      | ypN0 | M0 | no        | IIIA          | G2    | Adenocarcinoma | moderately differentiated |
| 337        | 72       | female | ICC                  | N/A        | pT2       | pN1  | M0 | no        | IIIB          | G2    | Adenocarcinoma | moderately differentiated |
| 338        | 72       | female | ICC                  | N/A        | pT2       | pN1  | M0 | no        | IIIB          | G2    | Adenocarcinoma | moderately differentiated |
